# Supplementary material for: Methanol oxidation on Ru(0001) for direct methanol fuel cells: analysis of the competitive reaction mechanism
Source: Royal Society of Chemistry journal article supplement (doi:10.1039/c5ra21793h), 2015-12-21
Supplement: c5ra21793h1.pdf [file c5ra21793h1.pdf]

## Electronic Supporting Information

### **Methanol oxidation on Ru(0001) for direct methanol fuel cells: Analysis of the competitive reaction mechanism**

Xiaoqing Lu,<sup>a\*</sup> Weili Wang,<sup>a</sup> Zhigang Deng,<sup>b</sup> Houyu Zhu,<sup>a\*</sup> Shuxian Wei,<sup>a</sup> Siu-Pang Ng,<sup>b</sup> Wenyue Guo,<sup>a\*</sup> Chi-Man Lawrence Wu<sup>b</sup>

*<sup>a</sup>College of Science, China University of Petroleum, Qingdao, Shandong 266580, P. R. China*

*<sup>b</sup>Department of Physics and Materials Science, City University of Hong Kong, Hong Kong SAR, P. R. China*

\*Corresponding authors: Xiaoqing Lu and Wenyue Guo

E-mail address: luxq@upc.edu.cn and wyguo@upc.edu.cn

Telephone: +86 532 8698 3372; Fax: +86 532 8698 3363

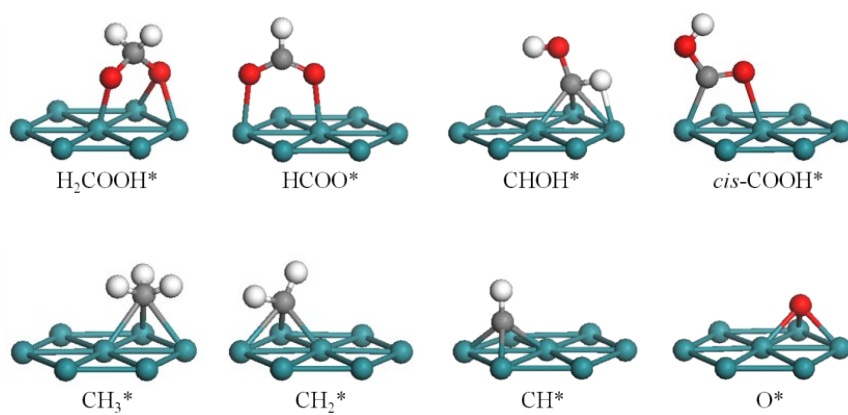

**Figure S1.** Intermediates involved in CH<sub>3</sub>OH oxidation on Ru (0001). Parameters follow the same notation as in Figure 1.

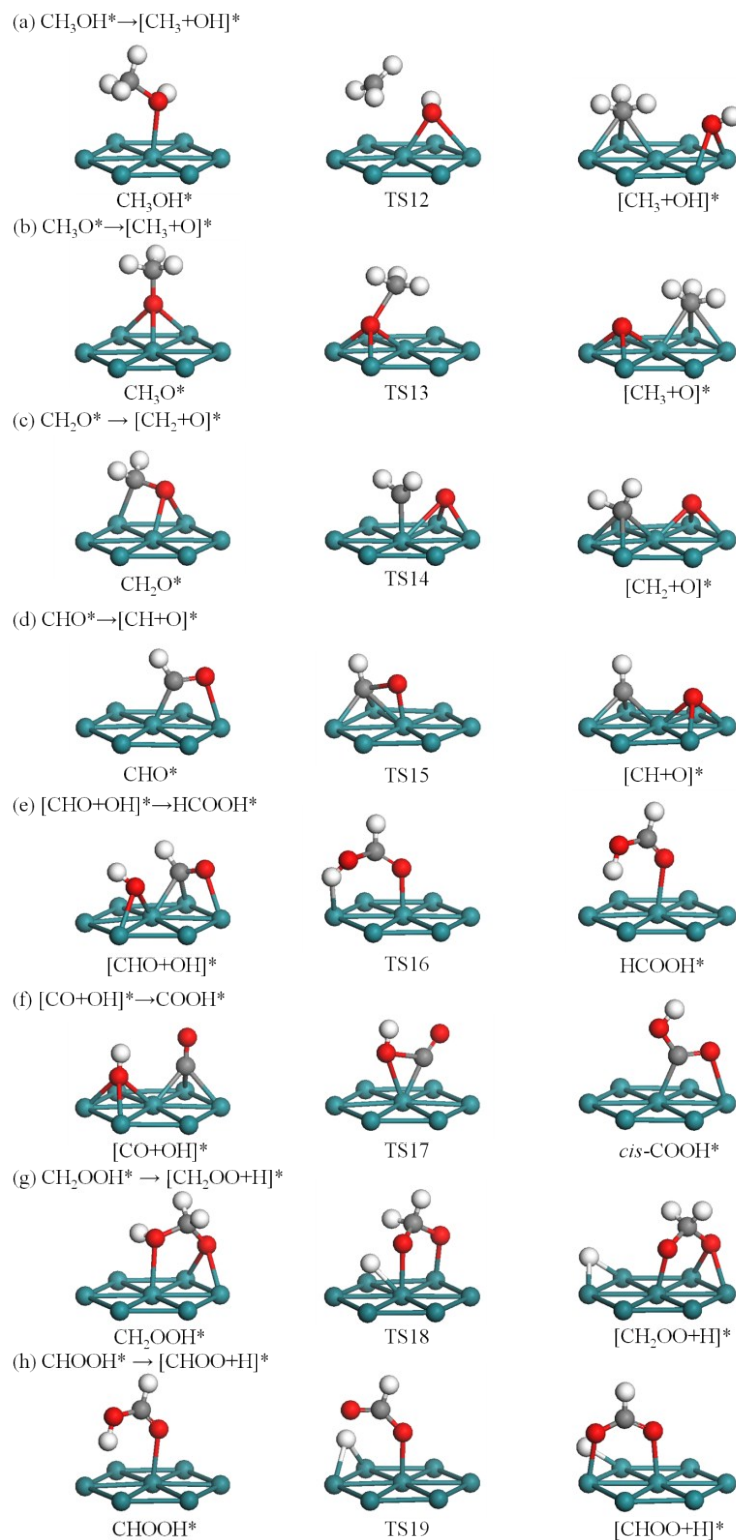

**Figure S2.** The C–O bond scissions of  $\text{CH}_3\text{OH}$  (a),  $\text{CH}_3\text{O}$  (b),  $\text{CH}_2\text{O}$  (c) and  $\text{CHO}$  (d), the combination of  $\text{CHO}$  and  $\text{OH}$  to form  $\text{HCOOH}$  (e), the reaction of  $\text{CO}$  with  $\text{OH}$  to form *cis*- $\text{COOH}$  (f), the dehydrogenation of  $\text{CH}_2\text{OOH}$  to  $\text{CH}_2\text{OO}$  (g) and further dehydrogenation to  $\text{CHOO}$  (h).

**Table S1.** Adsorption sites, adsorption energies (in eV), and structural parameters (in angstroms and degrees) for intermediates involved in CH<sub>3</sub>OH oxidation on Ru(0001).

| species             | site   | configuration                       | $E_{\text{ads}}$ | $d_{\text{C/H-Ru}}$ | $d_{\text{O-Ru}}$ | angles <sup>a</sup> |
|---------------------|--------|-------------------------------------|------------------|---------------------|-------------------|---------------------|
| H <sub>2</sub> COO* | hcp    | $\eta^1(\text{O})-\eta^2(\text{O})$ | 4.66             |                     | 2.02, 2.15, 2.18  | 72                  |
| HCOO*               | bridge | $\eta^1(\text{O})$                  | 3.24             |                     | 2.15, 2.15        | 0                   |
| CHOH*               | fcc    | $\eta^2(\text{C})$                  | 3.36             |                     | 2.11, 2.11        | 26                  |
|                     | hcp    | $\eta^3(\text{O})$                  | 3.42             |                     | 2.10, 2.10        | 43                  |
| <i>cis</i> -COOH*   | bridge | $\eta^1(\text{C})-\eta^1(\text{O})$ | 2.68             | 2.05                | 2.21              | 31, 85              |
|                     | fcc    | $\eta^1(\text{C})$                  | 2.67             | 2.03                |                   | 29, 84              |
|                     | hcp    | $\eta^1(\text{C})$                  | 2.68             | 2.03                |                   | 30, 83              |
| CH <sub>3</sub> *   | fcc    | $\eta^3(\text{C})$                  | 2.23             | 2.22, 2.22, 2.22    |                   |                     |
|                     | hcp    | $\eta^3(\text{C})$                  | 2.19             | 2.20, 2.21, 2.20    |                   |                     |
|                     | top    | $\eta^1(\text{C})$                  | 1.86             | 2.15                |                   |                     |
| CH <sub>2</sub> *   | fcc    | $\eta^3(\text{C})$                  | 5.00             | 2.09, 2.09, 2.24    |                   |                     |
|                     | hcp    | $\eta^3(\text{C})$                  | 5.07             | 2.09, 2.09, 2.20    |                   |                     |
| CH*                 | fcc    | $\eta^3(\text{C})$                  | 6.42             | 2.03, 2.03, 2.03    |                   |                     |
|                     | hcp    | $\eta^3(\text{C})$                  | 6.63             | 2.02, 2.02, 2.02    |                   |                     |
|                     | top    | $\eta^1(\text{C})$                  | 5.19             | 1.73                |                   |                     |
| O*                  | fcc    | $\eta^3(\text{O})$                  | 5.45             |                     | 2.05, 2.05, 2.05  |                     |
|                     | hcp    | $\eta^3(\text{O})$                  | 5.71             |                     | 2.02, 2.02, 2.02  |                     |

<sup>a</sup> Values are angles between the surface normal and the C–O axis in the corresponding species.
